# Supplementary material for: Evaluation of Water Chemistry in the Environs of Municipal Solid Waste Disposal Site, Jawaharnagar, Hyderabad, Telangana, India.
Source: Research Square preprint supplement (doi:10.21203/rs.3.rs-409709/v1), 2021-05-04
Supplement: Supplementary file 1 [file 91cf2ab881e43d7d41057897.xlsx]

## Sheet: Table 7
Table 7. % of samples suitable for drinking water and WQI classification.
Water quality	Complaince to DWS	Pre-2011	Post-2011	Pre-2012	Post-2012
Indian Standard Drinking Water-Specification (Second Revision) -IS 10500 : 2012 (BIS)	Requirement (Acceptable Limit)	0	0	0	0
	Permissible Limit in the Absence of Alternate Source	35	33	28	4
WQI Value	Classification
<50	Excellent	0	0	4	60
50-100	Good	64.7059	83.3333	80	20
101-200	Poor	35.2941	16.6667	16	16
201-300	Very Poor	0	0	0	0
>300	Unsuitable	0	0	0	4
