# Supplementary material for: Evaluation of Water Chemistry in the Environs of Municipal Solid Waste Disposal Site, Jawaharnagar, Hyderabad, Telangana, India.
Source: Research Square preprint supplement (doi:10.21203/rs.3.rs-409709/v1), 2021-05-04
Supplement: Supplementary file 2 [file 94f652dd8182103fd112129a.xlsx]

## Sheet: Pre_2012
Table 3. Water chemsitry results for Pre-monsoon 2012 along with water quality assessment
based on BIS drinking water specifications and WQI values.
Sl. No.	Village	pH	EC	TDS	TH	Ca2+	Mg2+	Na+	K+	HCO3- (as CaCO3)	Cl-	SO42-	NO3-	F-	WQI
			m S/cm		mg/l
	Surface water
1	Dammaiguda Tank	8.79	4390	2630	560	76	90	681	119	207	993	392	110	0.19	120.895
2	Cherial Tank	7.88	11390	7269	800	100.2	133.672	1495	1212.1	298.9	2906.9	1008	229.4	1.41	239.338
3	JNNURM Madyalavagu (Stream)	7.79	1762	951	575	128.256	61.9752	131.1	1.564	152.5	460.85	63.36	9.92	0.7	62.2667
	Groundwater
1	Ahmedguda kaman	7.96	1900	1158	610	50.1	117.874	184	9.384	475.8	311.96	121.92	71.92	0.9	93.2647
2	Maisamma temple	8.15	1200	762	385	50.1	63.1904	124.2	1.955	402.6	138.255	75.36	62	0.96	78.9487
3	Ahmedguda/ Bandlaguda	8.17	744	477	270	30.06	47.3928	71.3	0.782	366	35.45	27.84	39.68	0.97	64.1975
4	Aqua house Laxminagar colony	8.04	475	306	140	38.076	10.9368	57.5	1.173	262.3	17.725	12	7.44	0.95	46.2244
5	Masjid Rajivgruakalpa	7.1	9098	4654	4000	400.8	729.12	262.2	1.955	122	3119.6	34.56	31	0.33	192.67
6	Haridaspalli	7.54	2510	1438	860	252.504	55.8992	184	3.91	85.4	737.36	123.36	27.9	0.7	80.0402
7	Malakaram X Roads	7.48	3150	1784	1240	236.472	157.976	179.4	1.173	219.6	921.7	136.32	16.74	0.68	91.6615
8	Jami Masjid Bhagaya Nagar colony	8.06	859	508	340	56.112	48.608	46	0.782	274.5	77.99	49.92	58.9	1.9	79.2495
9	E.Nandamuri colony	7.9	725	445	265	92.184	8.5064	46	1.173	158.6	95.715	45.84	57.66	1.3	69.2617
10	Gabbilalapeta	7.97	1042	688	435	138.276	21.8736	50.6	1.173	152.5	152.435	43.2	186	1.02	116.182
11	NTR colony Ambedkar nagar	7.83	1200	765	445	68.136	66.836	96.6	1.173	286.7	173.705	93.6	89.28	1.02	88.0764
12	Rajiv Karmika nagar	7.18	4864	2656	1480	440.88	92.3552	404.8	1.173	146.4	1488.9	110.4	27.9	0.41	105.438
13	Rajiv Karmika nagar-II	7.52	1944	1064	705	200.4	49.8232	105.8	0.782	97.6	521.115	59.04	66.96	0.85	84.8285
14	Ven.brick ind.Bhagyangr colony	7.96	508	324	225	56.112	20.6584	27.6	1.173	219.6	38.995	31.584	11.78	1.84	56.8576
15	Rajiv swagrua, Ahmedguda	7.83	526	331	200	60.12	12.152	34.5	1.173	170.8	49.63	43.2	24.18	1.5	56.9625
16	Malakaram	7.84	610	388	230	54.108	23.0888	46	3.128	201.3	63.81	39.36	33.48	1.84	64.478
17	JNNURM Buildings	7.54	1447	823	505	106.212	58.3296	108.1	1.173	250.1	326.14	65.52	4.34	0.62	56.8665
18	Near JNNURM	8.01	578	368	200	34.068	27.9496	55.2	1.173	274.5	35.45	24	21.08	1.36	56.6325
19	Cherial X Road	7.82	1946	1197	325	50.1	48.608	322	1.173	347.7	404.13	144	13.95	1.36	69.7284
20	Cherial village	7.3	2332	1308	890	208.416	89.9248	133.4	2.737	134.2	694.82	52.8	43.4	0.36	80.1776
21	Near Cherial Tank	7.23	4278	2245	1390	192.384	221.166	322	3.91	298.9	1276.2	21.6	25.42	0.12	96.9868
22	Near Cherial Tank	7.31	4358	2266	1480	216.432	228.458	294.4	3.128	219.6	1347.1	31.2	10.54	0.41	96.5243
23	Near Cherial Tank	7.93	1560	882	370	50.1	59.5448	188.6	1.955	347.7	311.96	52.8	3.72	1.41	62.6567
24	Near Cherial Tank	7.65	2236	1289	760	112.224	116.659	195.5	2.346	262.3	638.1	59.04	4.34	0.84	70.9481
25	Venkateswara nagar	7.58	1351	827	465	106.212	48.608	92	0.782	170.8	209.155	86.88	178.56	0.23	109.92
Mean of Groundwater samples		7.716	2057.64	1158.12	728.6	132.024	97.0216	145.268	2.01756	237.9	527.496	63.4138	44.7268	0.9552	82.7512
